# Supplementary material for: Adiaspore development and morphological characteristics in a mouse adiaspiromycosis model
Source: PubMed Central journal article supplement (PMC7493162; doi:10.1186/s13567-020-00844-3), 2020-09-15
Supplement: 13567_2020_844_MOESM3_ESM.pdf [file 13567_2020_844_MOESM3_ESM.pdf]

# Additional File 3

4 dpi

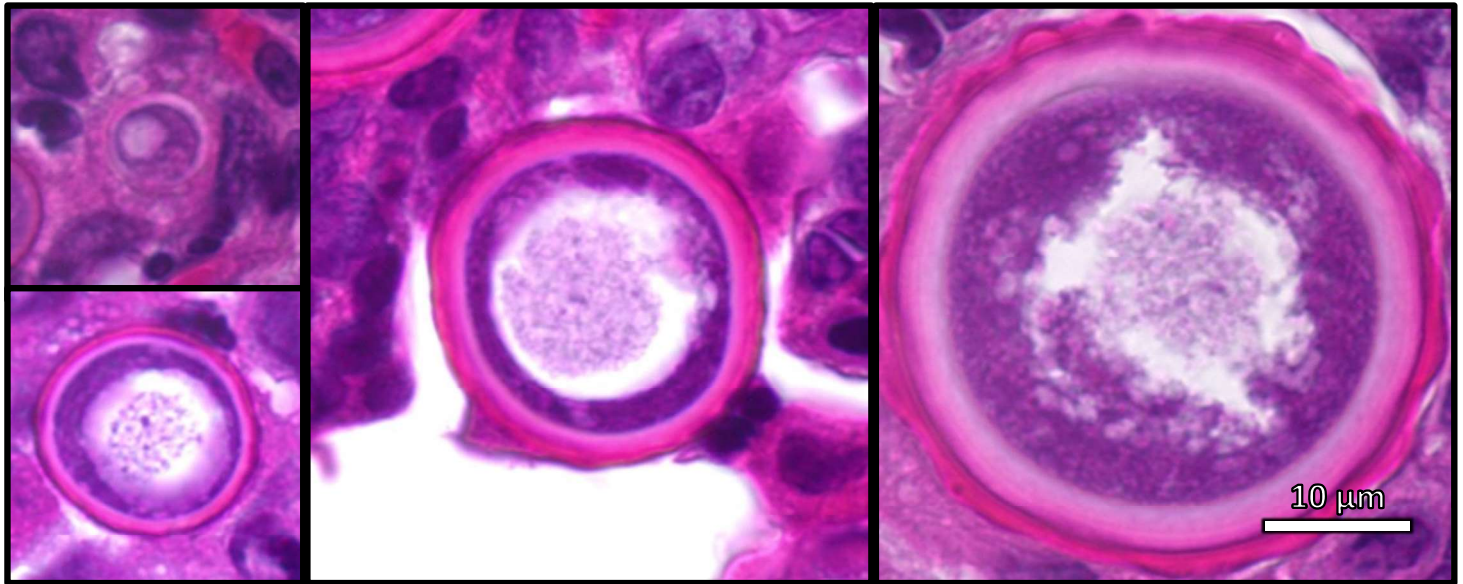

10 dpi

30 dpi

50 dpi
