# Supplementary material for: Adiaspore development and morphological characteristics in a mouse adiaspiromycosis model
Source: PubMed Central journal article supplement (PMC7493162; doi:10.1186/s13567-020-00844-3), 2020-09-15

# Additional file 7

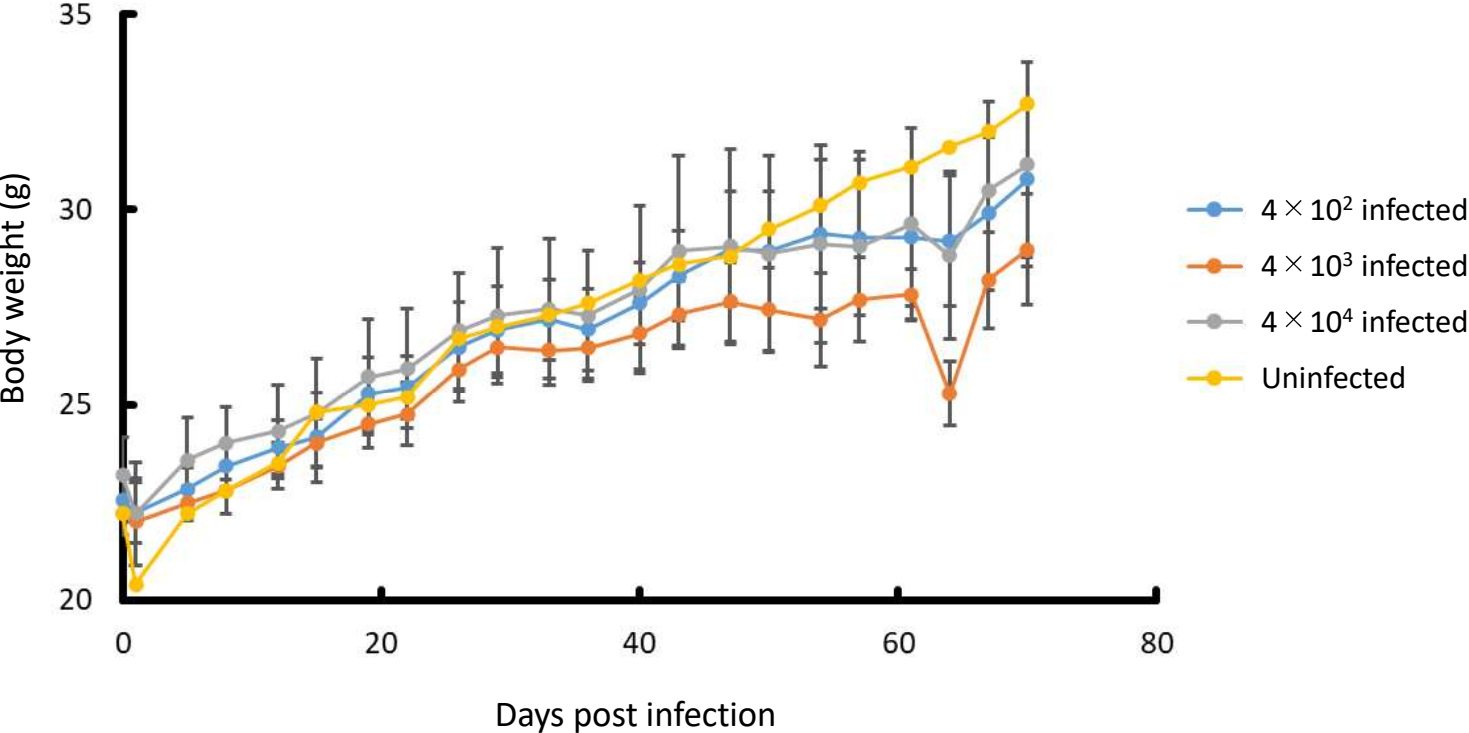

Supplement: 13567_2020_844_MOESM7_ESM.pdf [file 13567_2020_844_MOESM7_ESM.pdf]
